# Supplementary material for: Sympathetic Signaling Activation in Macrophages Alleviates LPS-induced ARDS through the HDC-H1R-SLC7A11 Axis
Source: Research Square preprint supplement (doi:10.21203/rs.3.rs-6760807/v1), 2025-09-05
Supplement: Supplementary file 2 [file 8ca66491997d5ae93600c88d.docx]

## Table 1. Primer sequences used for RT-qPCR

| Gene | Forward primer (5′→3′) | Reverse primer (5′→3′) |
| --- | --- | --- |
| SLC7A11 | CCTCTGCCAGCTGTTATTGTT | CCTGGCAAAACTGAGGAAAT |
| FTH1 | CCATCAACCGCCAGATCAAC | GAAACATCATCTCGGTCAAA |
| GPX4 | GCCTGGATAAGTACAGGGGTT | CATGCAGATCGACTAGCTGAG |
| HDC | ACTCCAAATGTGCAGCCTGGATACC | GGCTAGATGCCCACGTGAATCCTAA |
| STAT3 | GCCGCCGTAGTGACAGAGAA | GGCAGCAACATCCCCAGAGT |
| GAPDH | GTGGCAAAGTGGAGATTGTTG | CGTTGAATTTGCCGTGAGTG |
